# Supplementary material for: Gut microbiota in young adults with high-functioning autism spectrum disorder and its performance as diagnostic biomarkers
Source: Research Square preprint supplement (doi:10.21203/rs.3.rs-5753373/v1), 2025-01-13
Supplement: Supplementary file 1 [file 4d478a979b9ac4e0a9b55f09.docx]

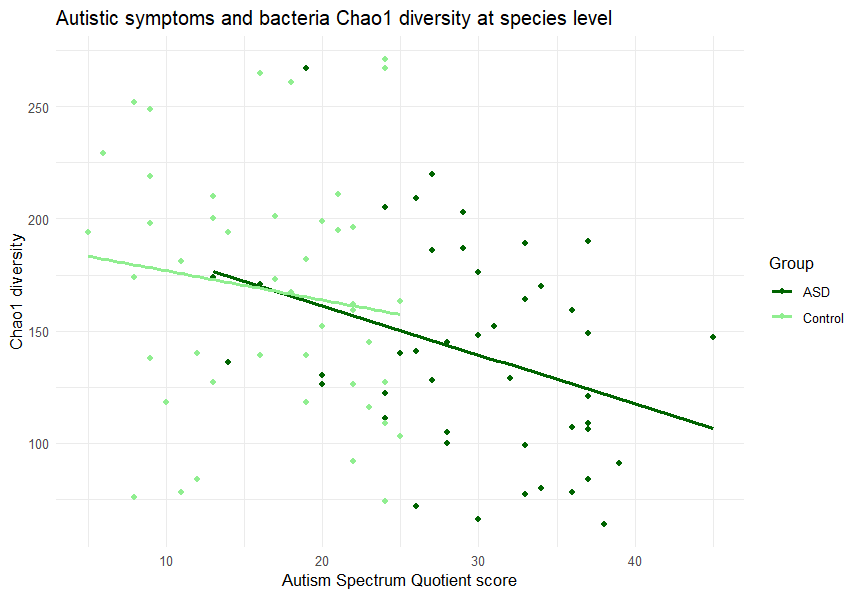


**Figure S1.** The correlations between Autism Spectrum Quotient scores and Chao1 Index values. P <0.001 as measured by Pearson’s correlation test across both ASD and control groups.


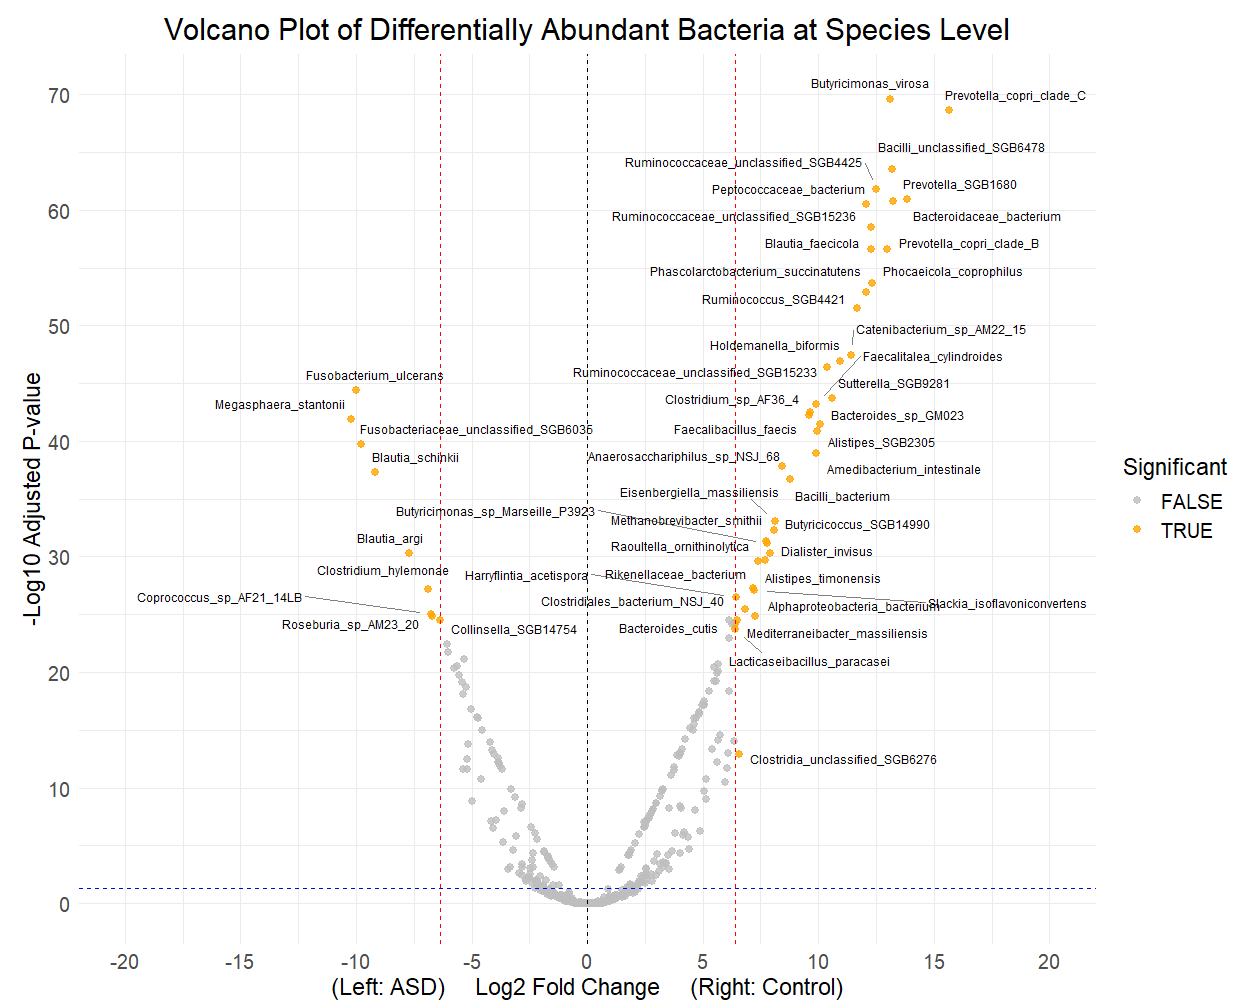


**Figure S2.** Volcano plot of differentially abundant bacterial species between ASD and control groups. Dots with yellow color represent the top 50 bacterial species with the largest log2 fold change.


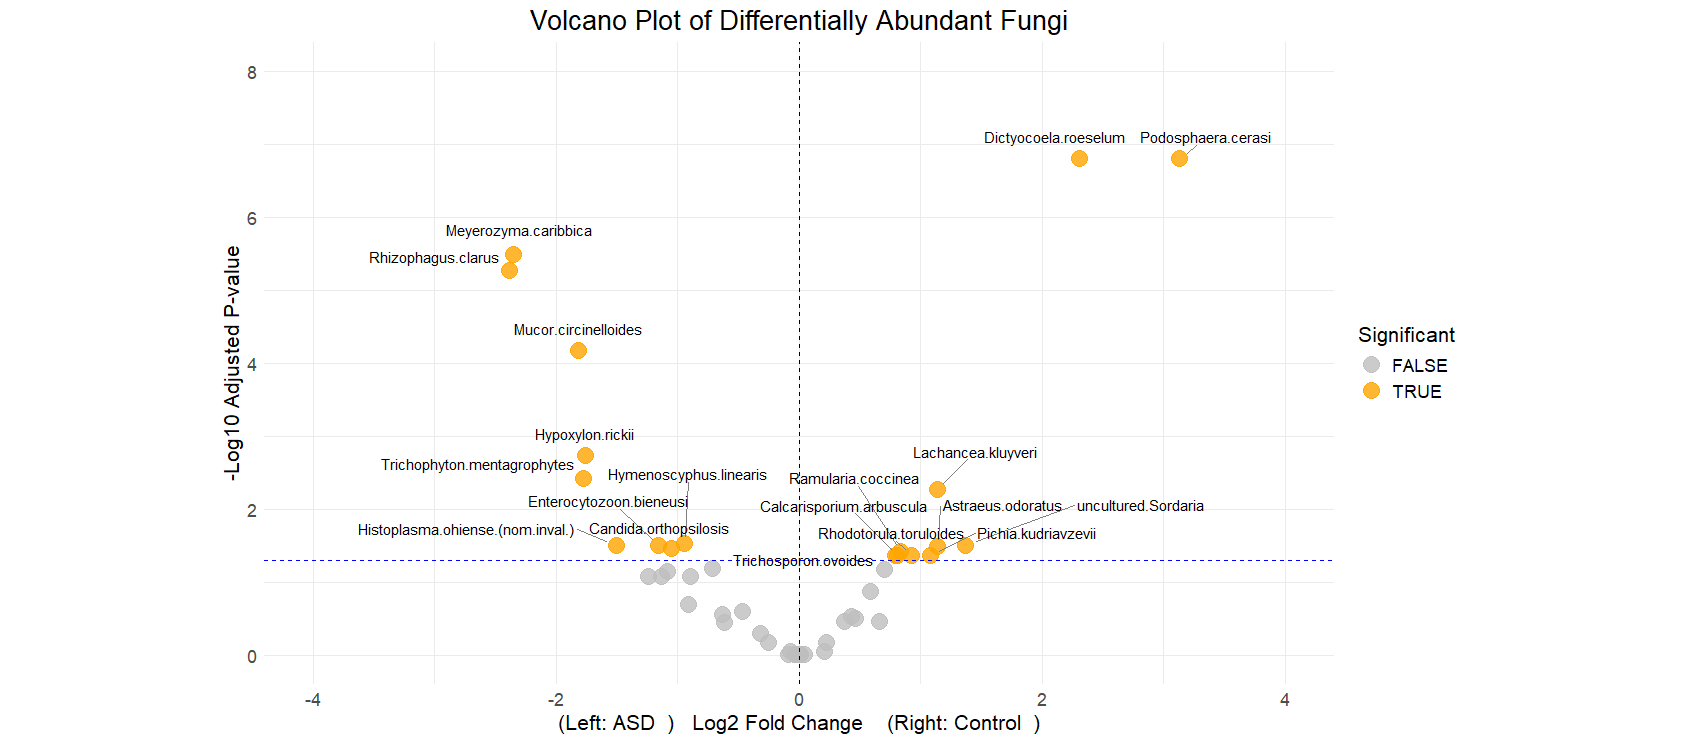


**Figure S3.** Volcano plot presents differentially abundant fungal species between ASD and control groups. Dots with yellow color represent the fungal species with adjusted p value < 0.05.


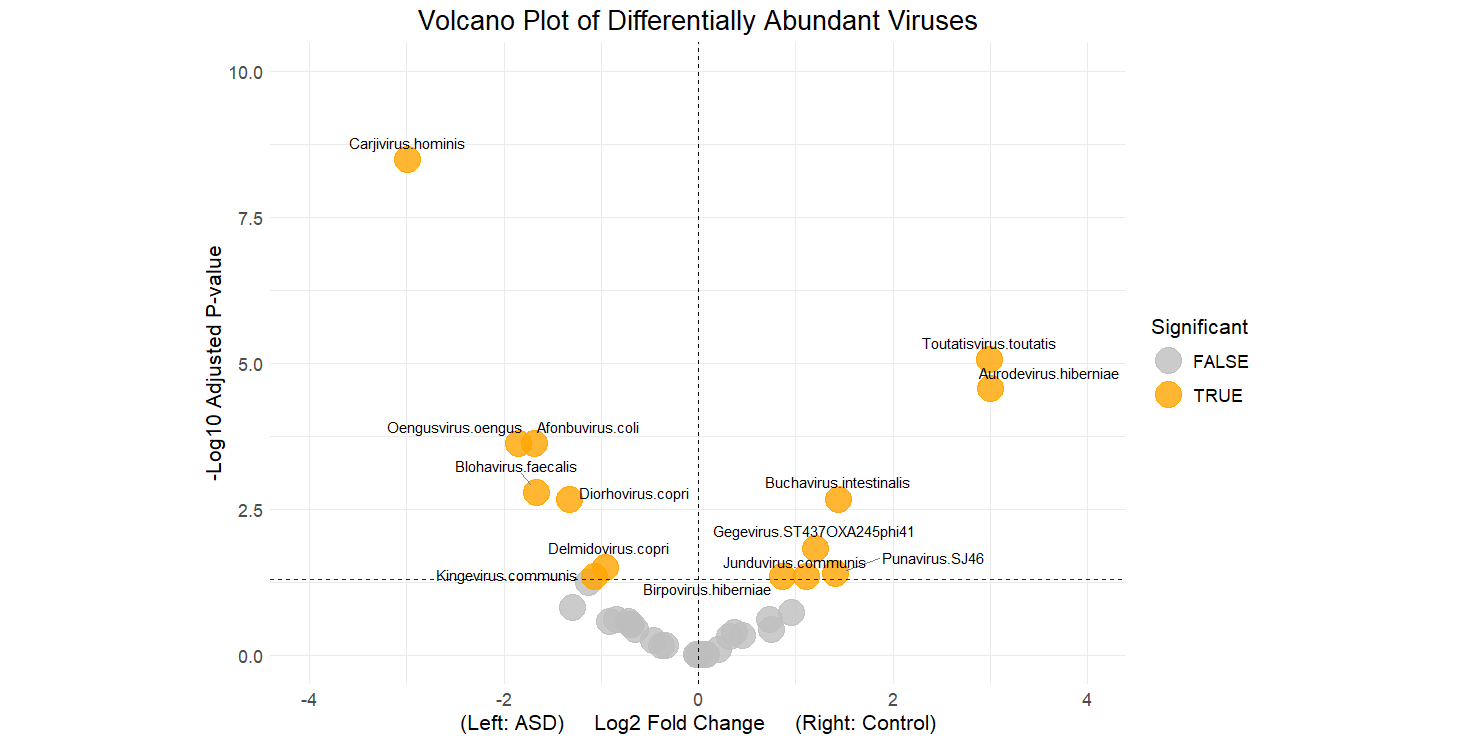


**Figure S4.** Volcano plot presents differentially abundant viral species between ASD and control groups. Dots with yellow color represent the viral species with adjusted p value < 0.05.


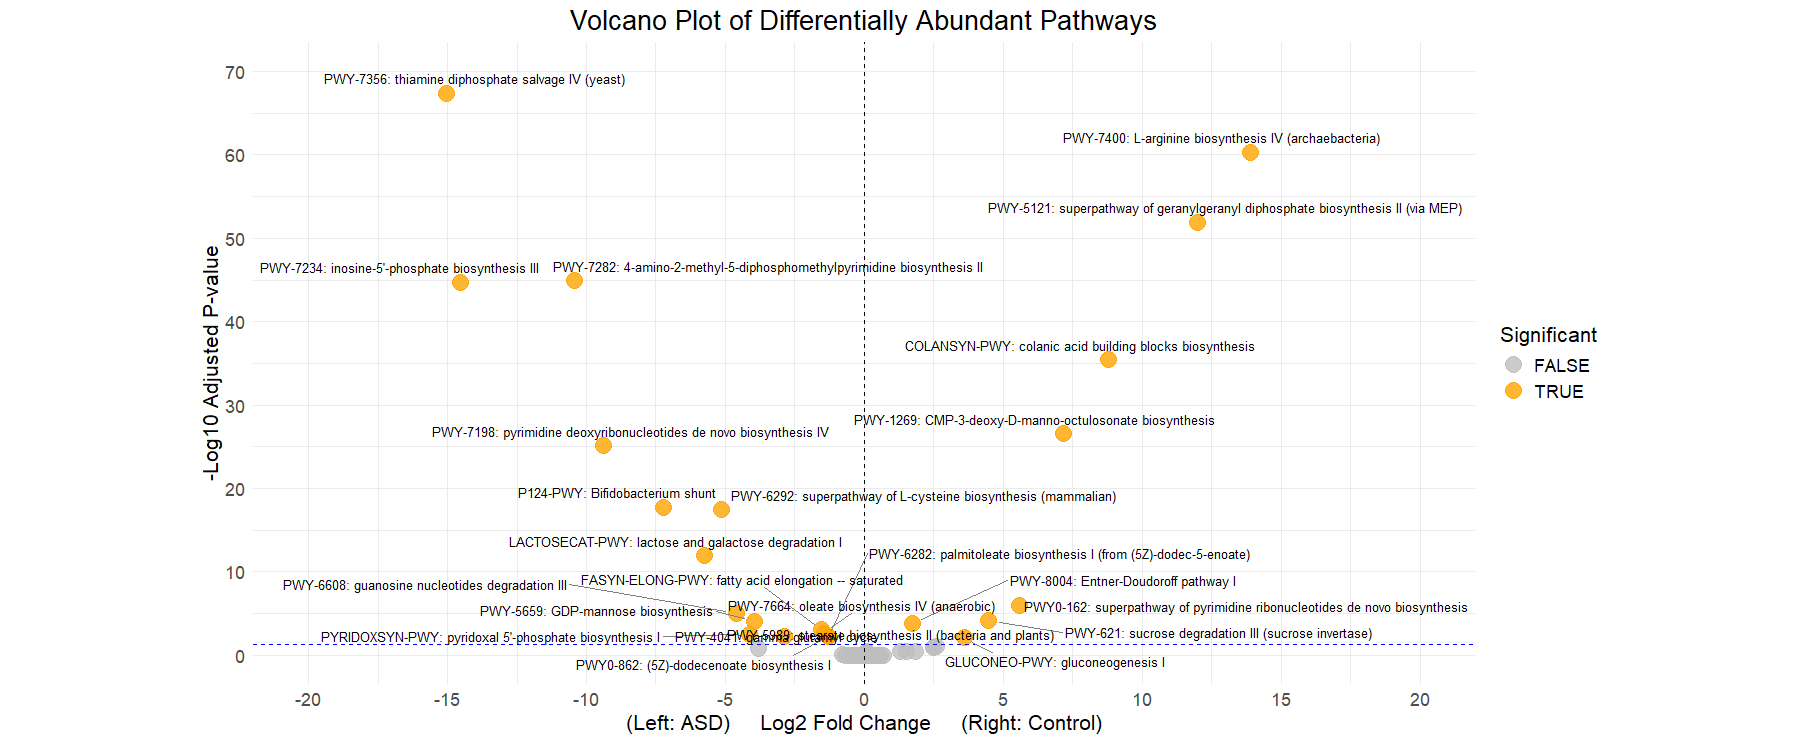


**Figure S5.** Volcano plot presents differentially abundant pathways between ASD and control groups. Dots with yellow color represent the pathways with adjusted p value < 0.05.


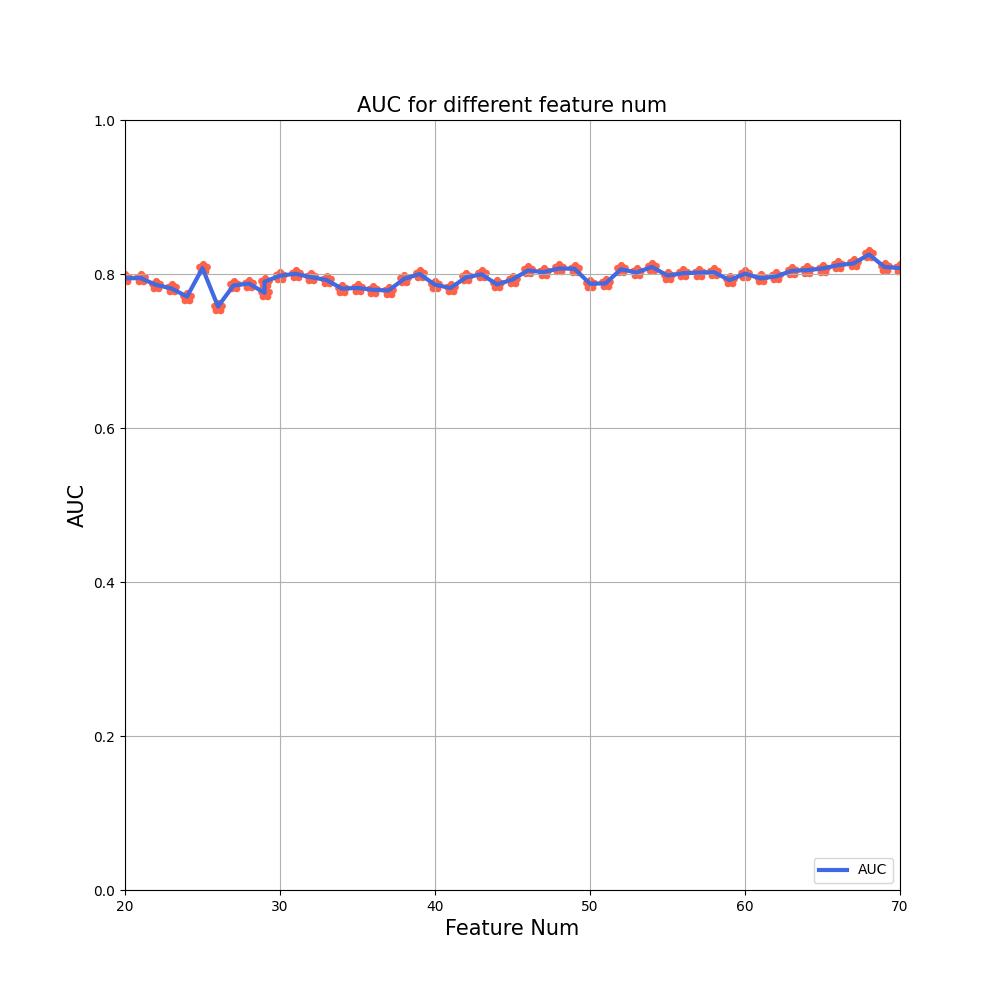
 Number of features

**Figure S6.** The associations between numbers of features selected and mean AUC values.

| **Table S1.** List of features selected in the prediction model | |
| --- | --- |
| Group | Name of feature |
| Bacteria | Anaerostipes hadrus  Ruminococcaceae bacterium  Butyricimonas virosa  Bacteroides salyersiae  Ruminococcaceae bacterium AM07-15  Anaerotruncus rubiinfantis  Anaeromassilibacillus sp. An250  Oscillospiraceae bacterium NSJ64  Bifidobacterium longum  Actinomyces oris  Rothia mucilaginosa  Isoptericola variabilis  Streptococcus mutans  Clostridiales unclassified SGB15145  Corynebacterium durum  Peptococcaceae bacterium  Prevotella copri clade A  Clostridiaceae unclassified SGB4769  Mediterraneibacter massiliensis  Massilimaliae massiliensis |
| Fungi | Meyerozyma caribbica  Dictyocoela roeselum  Mucor circinelloides |
| Pathways | PWY-7234: inosine-5’-phosphate biosynthesis III  PWY-4041: gamma-glutamyl cycle |
